# Supplementary material for: Bicyclic ammonium ionic liquids as dense hypergolic fuels
Source: Royal Society of Chemistry journal article supplement (doi:10.1039/c7ra03090h), 2017-01-01
Supplement: c7ra03090h1.pdf [file c7ra03090h1.pdf]

## Supplementary Information

### Bicyclic ammonium ionic liquids as dense hypergolic fuels

Yutao Yuan,<sup>a,b</sup> Yanqiang Zhang,<sup>a\*</sup> Long Liu, Nianming Jiao,<sup>a,b</sup> Kun Dong,<sup>a</sup> Suojian Zhang<sup>a\*</sup>

<sup>a</sup> Division of Ionic Liquids and Green Engineering, Institute of Process

Engineering, Chinese Academy of Sciences, Beijing 100190, China. E-mail:

yqzhang@ipe.ac.cn, sjzhang@ipe.ac.cn; FAX: +86-10-82544875

<sup>b</sup> School of Chemistry and Chemical Engineering, University of Chinese Academy of Sciences, Beijing 100049, China

#### Contents

**Table S1.** Bond lengths [Å] for **15b**

**Table S2.** Bond angles [°] for **15b**

**Table S3.** Torsion angles [°] for **15b**

**Scheme S1.** Isodesmic reactions for calculating the heat of ABCO-based cations

**Scheme S2.** Isodesmic reactions for calculating the heat of DABCO-based cations

**Figure S1.** DSC curves of **12b** and **15a**

**Figure S2.** Ignition delay times recorded by a high-speed camera (1000 frames s<sup>-1</sup>) of DABCO-based ionic liquids

**Figure S3.** Ignition delay times recorded by a high-speed camera (1000 frames s<sup>-1</sup>) of ABCO-based ionic liquids

**Table S1.** Bond lengths [Å] for **15b**

|                |          |
|----------------|----------|
| N (2) – C (7)  | 1.500(2) |
| N (2) – C (5)  | 1.512(2) |
| N (2) – C (3)  | 1.514(2) |
| N (2) – C (1)  | 1.514(2) |
| C (7) – C (8)  | 1.468(3) |
| C (4) – C (3)  | 1.535(3) |
| C (5) – C (6)  | 1.542(3) |
| N (3) – C (8)  | 1.144(3) |
| C (1) – C (2)  | 1.540(3) |
| C (10) – N (6) | 1.160(3) |
| C (10) – N (4) | 1.320(3) |
| C (9) – N (5)  | 1.160(3) |
| C (9) – N (4)  | 1.309(3) |

**Table S2.** Bond angles [°] for **15b<sup>a</sup>**

|                        |            |
|------------------------|------------|
| N (1) – C (4) – C (3)  | 111.72(15) |
| N (2) – C (5) – C (6)  | 107.92(15) |
| N (2) – C (3) – C (4)  | 108.36(15) |
| N (1) – C (6) – C (5)  | 111.90(15) |
| N (2) – C (1) – C (2)  | 108.36(14) |
| N (3) – C (8) – C (7)  | 179.8(2)   |
| N (1) – C (2) – C (1)  | 111.46(15) |
| N (6) – C (10) – N (4) | 173.5(2)   |
| N (5) – C (9) – N (4)  | 173.3(2)   |
| C (9) – N (4) – C (10) | 119.94(17) |
| C (6) – N (1) – C (4)  | 108.68(15) |
| C (2) – N (1) – C (4)  | 109.14(15) |
| C (2) – N (1) – C(6)   | 108.25(15) |
| C (7) – N (2) – C(5)   | 110.71(14) |
| C (7) – N (2) – C(3)   | 111.09(14) |
| C (7) – N (2) – C(1)   | 108.49(14) |
| C (3) – N (2) – C(5)   | 108.90(14) |
| C (3) – N (2) – C(1)   | 109.16(15) |
| C (1) – N (2) – C(5)   | 108.43(15) |
| C (8) – C (7) – N(2)   | 111.44(15) |

<sup>a</sup> Symmetry transformations used to generate equivalent atoms

**Table S3.** Torsion angles [°] for **15b**

---

|                                |             |
|--------------------------------|-------------|
| C (5) – N (2) – C (7) – C (8)  | -65.5(2)    |
| C (3) – N (2) – C (7) – C (8)  | 55.7(2)     |
| C (1) – N (2) – C (7) – C (8)  | 175.58(17)  |
| C (2) – N (1) – C (4) – C (3)  | -54.8(2)    |
| C (6) – N (1) – C (4) – C (3)  | 63.7(2)     |
| C (7) – N (2) – C (5) – C (6)  | -173.94(15) |
| C (3) – N (2) – C (5) – C (6)  | 63.6(2)     |
| C (1) – N (2) – C (5) – C (6)  | -55.0(2)    |
| C (7) – N (2) – C (3) – C (4)  | -177.35(16) |
| C (5) – N (2) – C (3) – C (4)  | -55.1(2)    |
| C (1) – N (2) – C (3) – C (4)  | 63.1(2)     |
| N (1) – C (4) – C (3) – N (2)  | -7.5(2)     |
| C (2) – N (1) – C (6) – C (5)  | 64.4(2)     |
| C (4) – N (1) – C (6) – C (5)  | -54.6(2)    |
| N (2) – C (5) – C (6) – N (1)  | -7.7(2)     |
| C (7) – N (2) – C (1) – C (2)  | -175.79(17) |
| C (5) – N (2) – C (1) – C (2)  | 63.8(2)     |
| C (3) – N (2) – C (1) – C (2)  | -54.6(2)    |
| N (2) – C (7) – C (8) – N (3)  | -151(100)   |
| C (6) – N (1) – C (2) – C (1)  | -55.2(2)    |
| C (4) – N (1) – C (2) – C (1)  | 63.6(2)     |
| N (2) – C (1) – C (2) – N (1)  | -7.5(2)     |
| N (5) – C (9) – N (4) – C (10) | 161.5(19)   |
| N (6) – C (10) – N (4) – C (9) | -176(2)     |

---

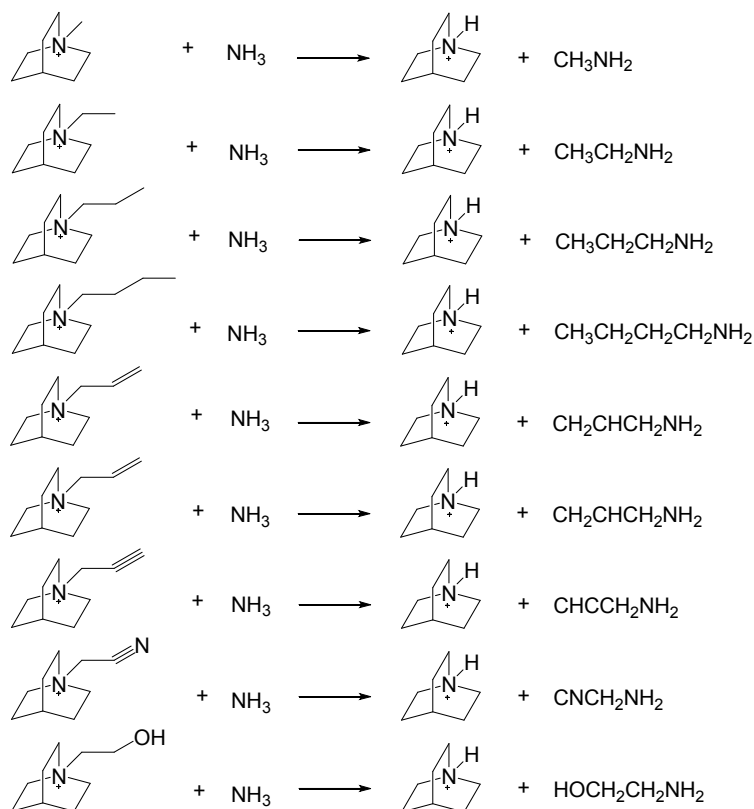

**Scheme S1.** Isodesmic reactions for calculating the heat of ABCO-based cations

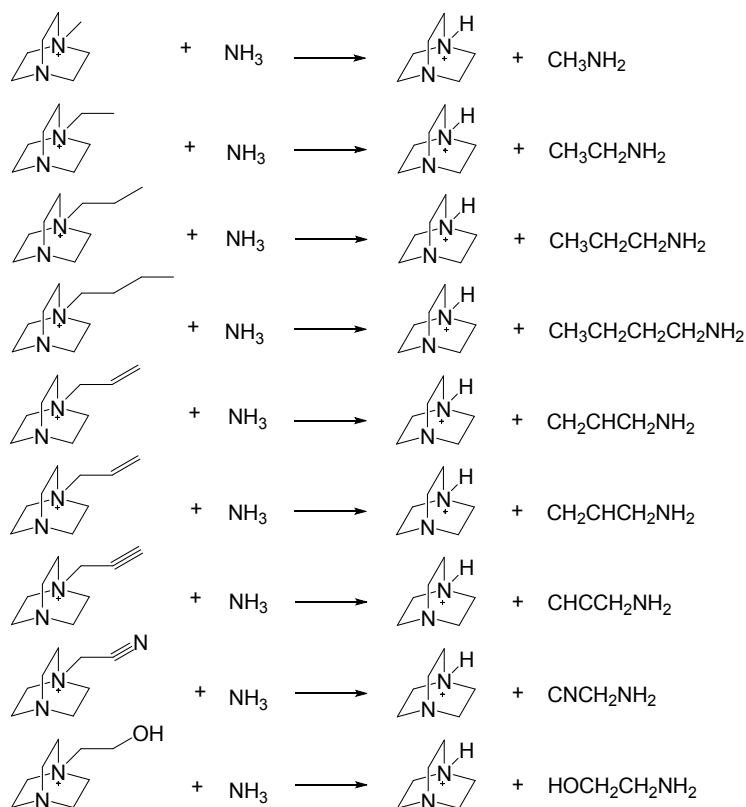

**Scheme S2.** Isodesmic reactions for calculating the heat of DABCO-based cations

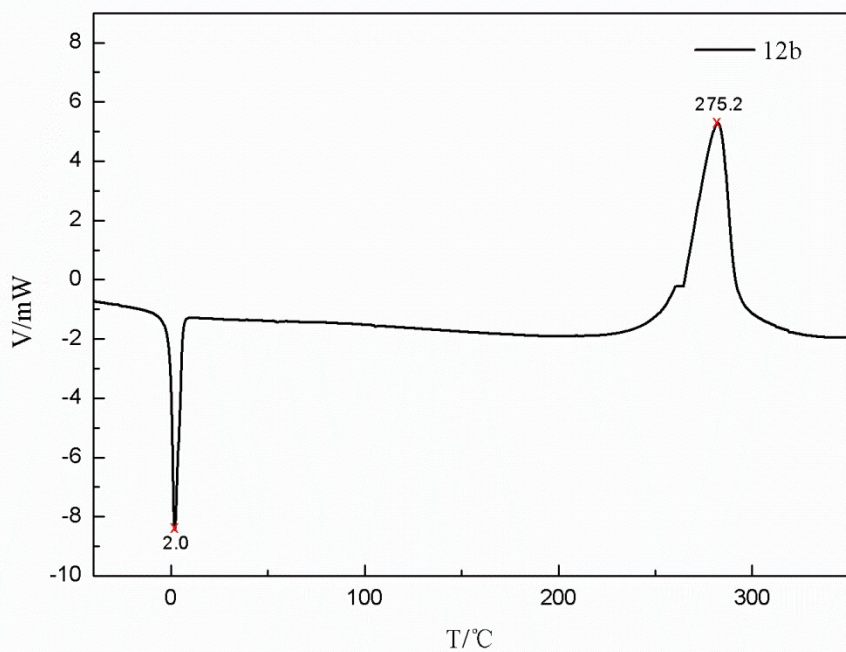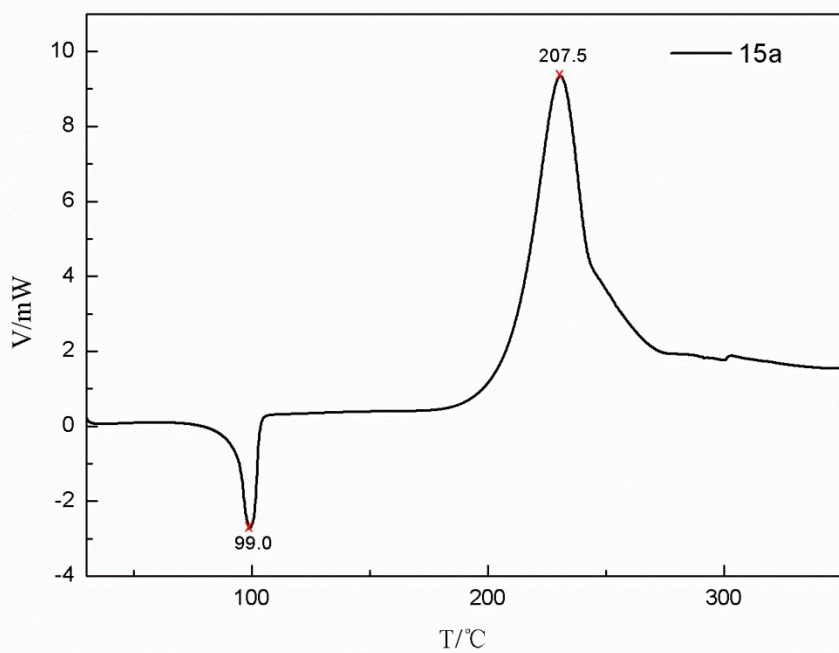

**Figure S1.** DSC curves of **12b** and **15a**

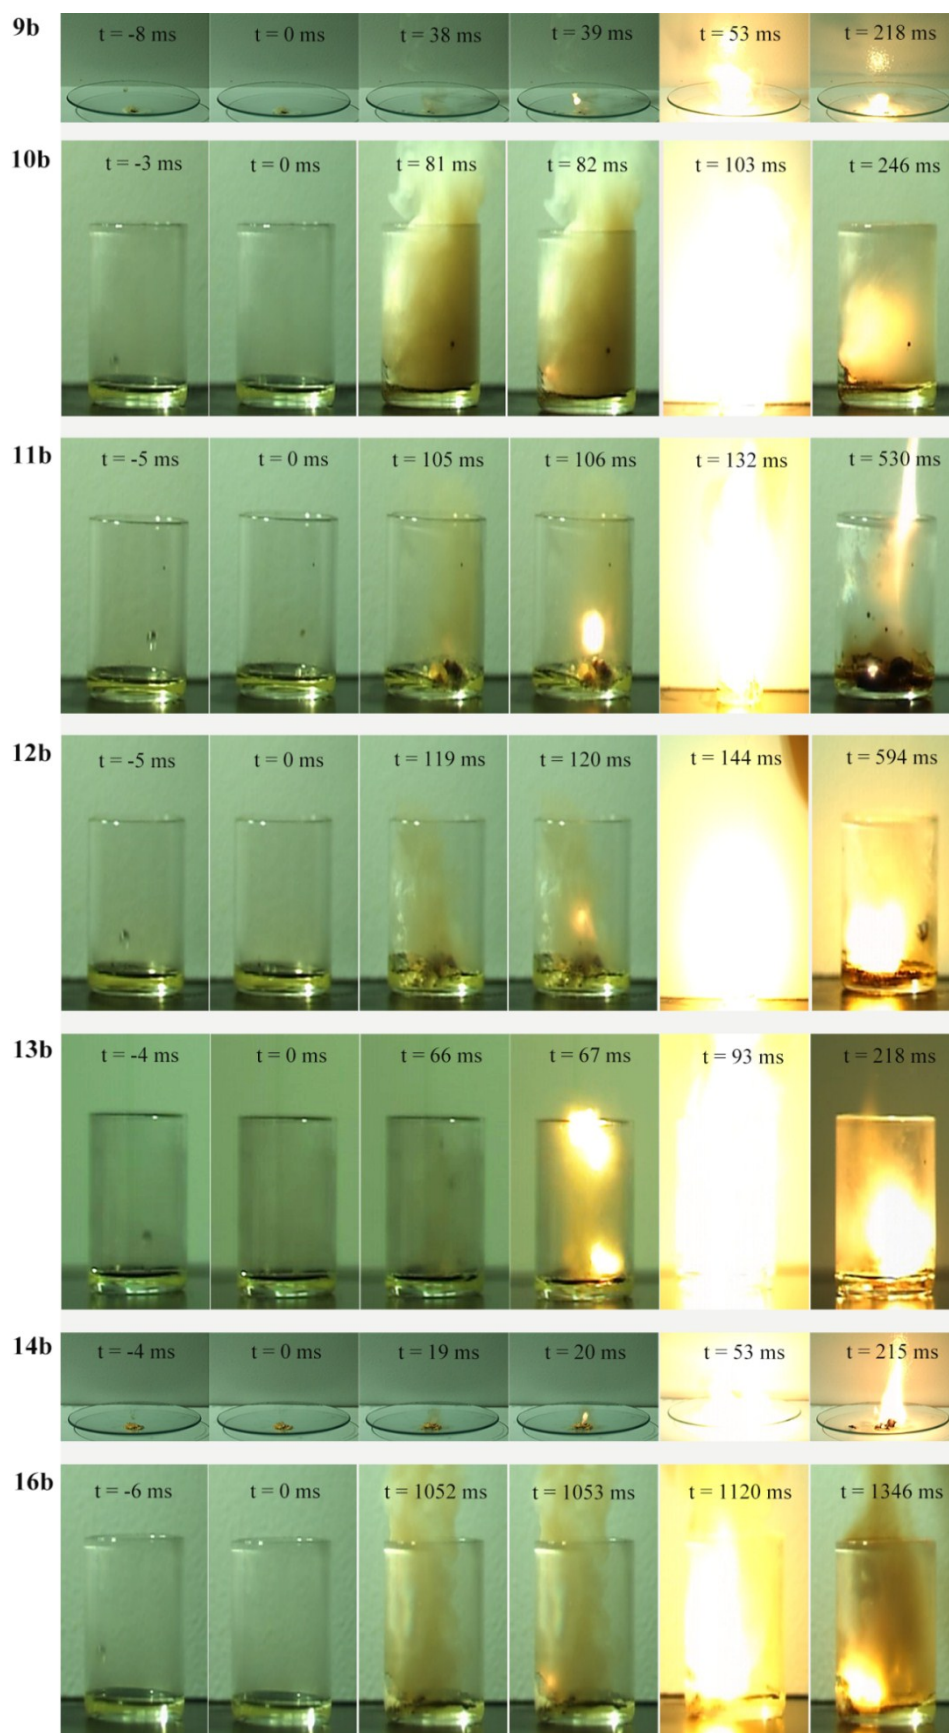

**Figure S2.** Ignition delay times recorded by a high-speed camera ( $1000 \text{ frames s}^{-1}$ ) of DABCO-based ionic liquids

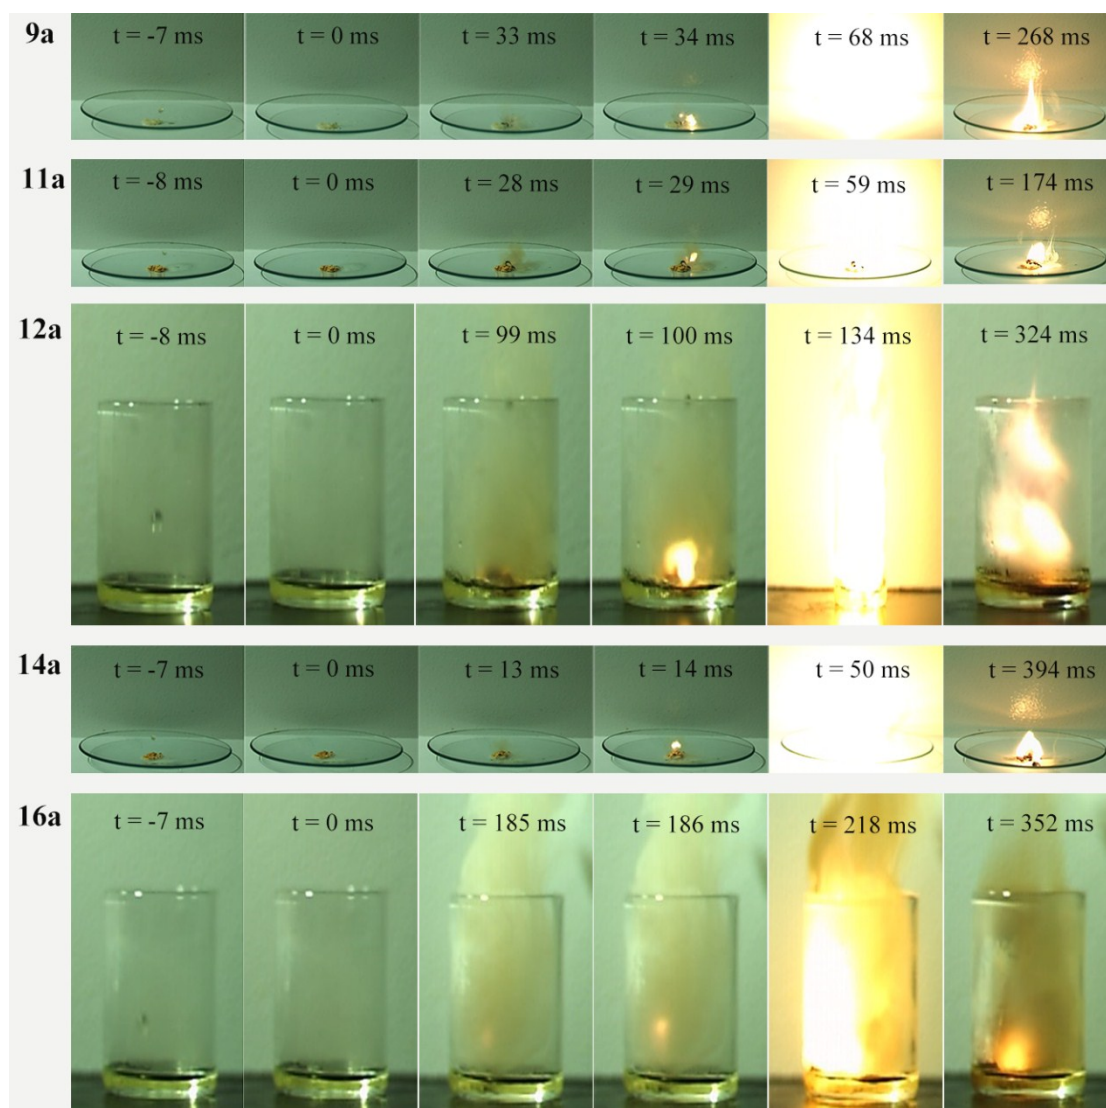

**Figure S3.** Ignition delay times recorded by a high-speed camera (1000 frames s<sup>-1</sup>) of ABCO-based ionic liquids
